# Supplementary material for: Electroconvulsive Therapy Augmentation in Clozapine-Resistant Schizophrenia: A Prospective, Randomized Study
Source: Atypon-hosted journal article supplement (doi:10.1176/appi.focus.17106), 2019-01-01
Supplement: appi.focus.17106.ds001.pdf [file appi.focus.17106.ds001.pdf]

| Baseline comparisons        |             |             |         |
|-----------------------------|-------------|-------------|---------|
|                             | Non-ECT     | ECT         | p-value |
| Global Affective Flattening | 1.79 (1.65) | 2.50 (1.36) | 0.1524  |
| Global Alogia               | 2.00 (1.56) | 2.00 (1.56) | 0.9999  |
| Global Avolition            | 2.68 (1.42) | 2.80 (0.95) | 0.7676  |
| Global Asociality Anhedonia | 2.72 (1.13) | 2.65 (1.18) | 0.8483  |

| Percent change from baseline to final week |         |        |         |
|--------------------------------------------|---------|--------|---------|
|                                            | Non-ECT | ECT    | p-value |
| Global Affective Flattening                | 14.81   | -27.45 | 0.0585  |
| Global Alogia                              | 19.44   | -1.08  | 0.3435  |
| Global Avolition                           | 30.56   | -9.51  | 0.1192  |
| Global Asociality Anhedonia                | 36.11   | -1.37  | 0.1619  |

| Percent change from baseline to week 4 |         |        |         |
|----------------------------------------|---------|--------|---------|
|                                        | Non-ECT | ECT    | p-value |
| Global Affective Flattening            | 23.06   | -10.20 | 0.2927  |
| Global Alogia                          | -4.44   | 20.42  | 0.2538  |
| Global Avolition                       | 9.09    | -6.67  | 0.1355  |
| Global Asociality Anhedonia            | 20.83   | -1.11  | 0.1380  |
